# Supplementary material for: A class of secreted mammalian peptides with potential to expand cell-cell communication
Source: PubMed Central journal article supplement (PMC10709327; doi:10.1038/s41467-023-43857-0), 2023-12-08
Supplement: 41467_2023_43857_MOESM1_ESM.pdf [file 41467_2023_43857_MOESM1_ESM.pdf]

Supplementary Information

**A class of secreted mammalian peptides with potential to expand cell-cell  
communication**

Wiggenhorn et al.

**a. CAP-LAMB2**  
EIC of MS1

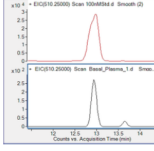

MS1 spectra

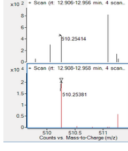

MS2 - 510.3>249.1 (b2+)

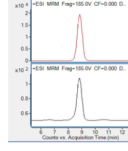

**b. CAP-ADAMTS18**  
EIC of MS1

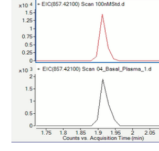

MS1 spectra

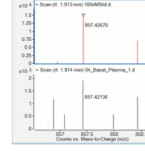

MS2 - 215.1>136.9 (b5++++)

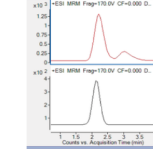

**c. CAP-VIP**  
EIC of MS1

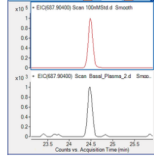

MS1 spectra

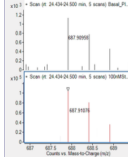

MS2 - 687.9>608.9 (a11++)

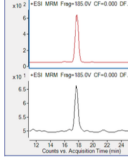

**d. CAP-TAC1**  
EIC of MS1

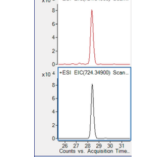

MS1 spectra

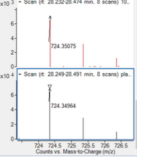

MS2 - 724.3>463.2 (b4+)

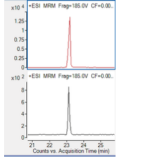

**e. CAP-OBSCN**  
EIC of MS1

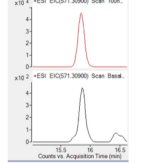

MS1 spectra

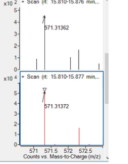

MS2 - 571.3>248.1 (y2+)

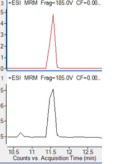

**f. CAP-FGF5**  
EIC of MS1

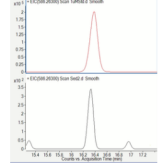

MS1 spectra

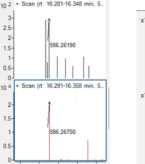

MS2 - 586.3>202.1 (y2+)

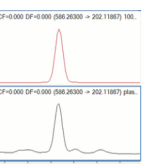

**g. CAP-EMILIN1**  
EIC of MS1

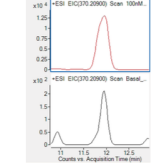

MS1 spectra

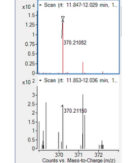

MS2 - 370.2>183.1 (b2+)

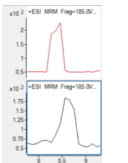

**h. CAP-WNT3A**  
EIC of MS1

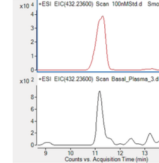

MS1 spectra

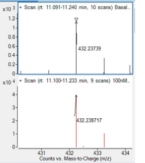

MS2 - 432.3>157.1 (z1+)

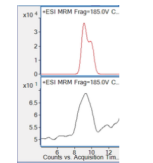

**i. CAP-THBS4**  
EIC of MS1

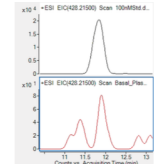

MS1 spectra

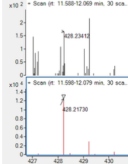

MS2 - 428.2>225.1 (b2+)

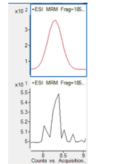

**j. CAP-CSF1**  
EIC of MS1

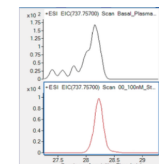

MS1 spectra

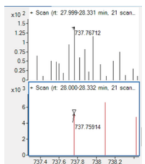

MS2 - 737.8>976.6 (b18++)

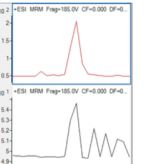

**k. CAP-COL27A1**  
EIC of MS1

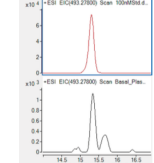

MS1 spectra

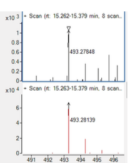

MS2 - 493.3>212.1 (y2+)

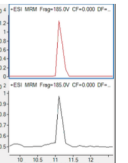

**l. CAP-DEFA-RS7**  
EIC of MS1

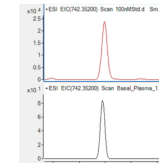

MS1 spectra

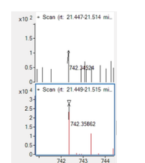

MS2 - 742.4>539.2 (b6+)

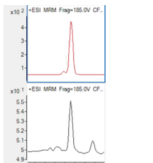

**m. CAP-METTL24**  
EIC of MS1

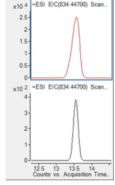

**MS1 spectra**

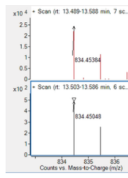

**MS2 - 834.4>475.2 (b4+)**

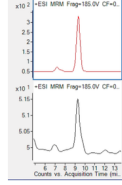

**n. CAP-TENM1**  
EIC of MS1

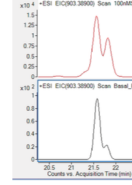

**MS1 spectra**

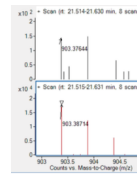

**MS2 - 903.4>886.3 (z7+)**

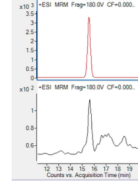

**o. CAP-CA15**  
EIC of MS1

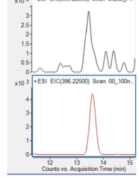

**MS1 spectra**

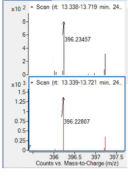

**MS2 - 396.2>188.1 (v2+)**

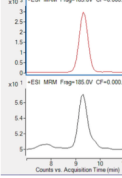

**p. CAP-ANGPTL4**  
EIC of MS1

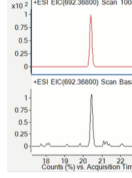

**MS1 spectra**

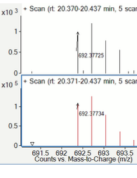

**MS2 - 692.4>453.2 (b4+)**

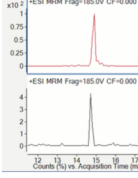

**q. GnRH**  
EIC of MS1

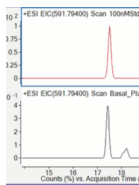

**MS1 spectra**

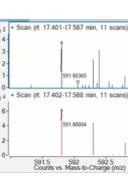

**MS2 - 591.8>249.1 (b2+)**

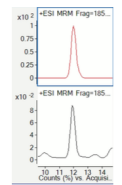

**r. CAP-CNPY4**  
EIC of MS1

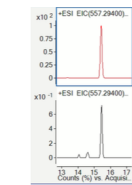

**MS1 spectra**

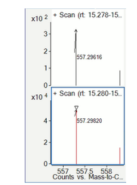

**MS2 - 557.3>439.2 (b4+)**

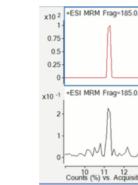

**s. CAP-NTN4**  
EIC of MS1

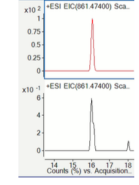

**MS1 spectra**

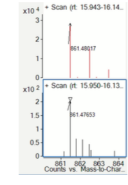

**MS2 - 861.5>249.1 (b2+)**

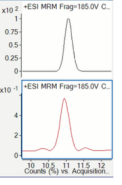

**t. CAP-GDNF**  
EIC of MS1

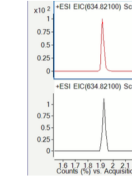

**MS1 spectra**

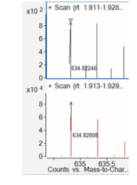

**MS2 - 634.8>325.2 (b4+)**

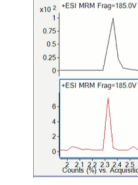

**u. CAP-TAC4**  
EIC of MS1

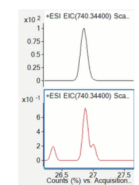

**MS1 spectra**

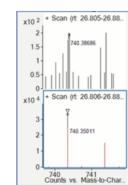

**MS2 - 740.3>479.2 (b4+)**

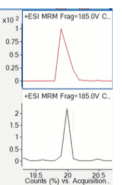

**v. CAP-DEFB1**  
EIC of MS1

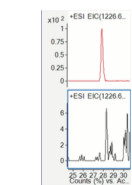

**MS1 spectra**

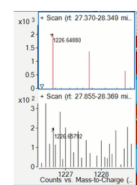

**MS2 - 1226.6>795.4 (b8+)**

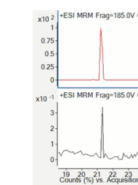

**w. CAP-PRG4**  
EIC of MS1

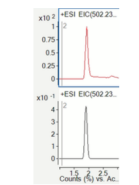

**MS1 spectra**

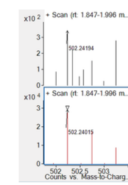

**MS2 - 502.2>382.2 (y6++)**

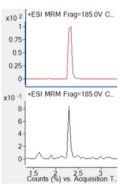

**x. CAP-PLAG2G2A**  
EIC of MS1

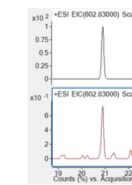

**MS1 spectra**

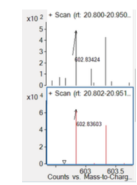

**MS2 - 602.8>231.1 (a2+)**

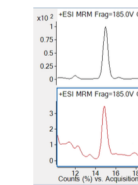

**y. CAP-FGF18**

EIC of MS1

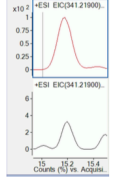

MS1 spectra

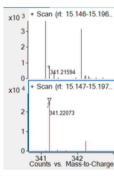

MS2 - 341.2>131.1 (y1+)

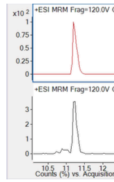

**z. CAP-LY86**

EIC of MS1

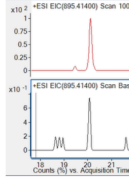

MS1 spectra

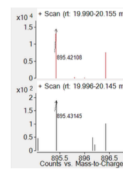

MS2 - 903.4>484.3 (b4+)

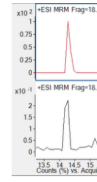

**aa. CAP-VIP-2**

EIC of MS1

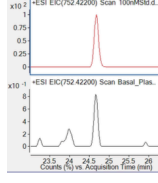

MS1 spectra

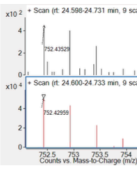

MS2 - 752.4>132.1 (y1+)

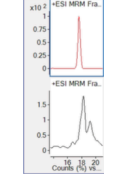

**bb. CAP-PRSS36**

EIC of MS1

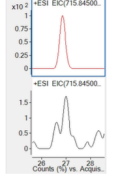

MS1 spectra

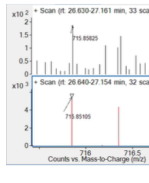

MS2 - 715.8>244.1 (y2+)

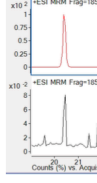

**cc. CAP-GNAS**

EIC of MS1

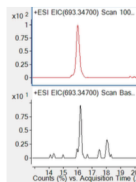

MS1 spectra

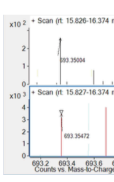

MS2 - 693.3>325.2 (y3+)

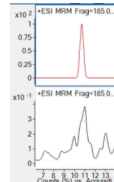

**dd. CAP-GDF15**

EIC of MS1

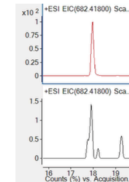

MS1 spectra

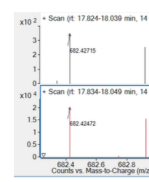

MS2 - 682.4>354.2 (b3+)

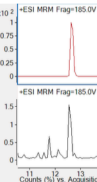

**ee. CAP-TAC3**

EIC of MS1

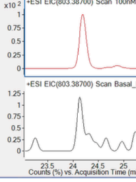

MS1 spectra

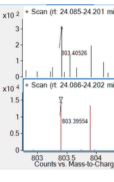

MS2 - 803.4>729.4 (b12++)

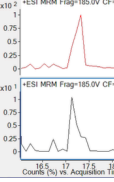

**ff. CAP-EGFL8**

EIC of MS1

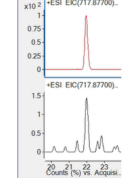

MS1 spectra

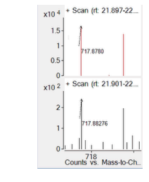

MS2 - 717.9>859.4 (b7+)

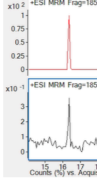

**gg. CAP-COL5A2-2**

EIC of MS1

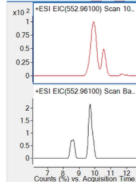

MS1 spectra

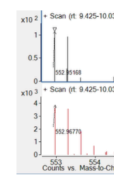

MS2 - 553.0>454.2 (b4+)

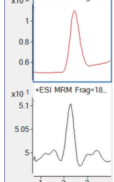

**hh. CAP-MST1**

EIC of MS1

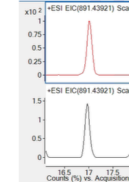

MS1 spectra

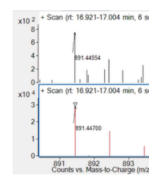

MS2 - 891.4 >306.2 (y2+)

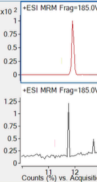

**ii. CAP-ALKAL2**

EIC of MS1

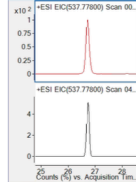

MS1 spectra

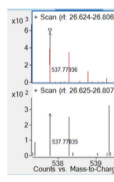

MS2 - 1074.5>944.4 (b9+)

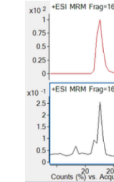

**jj. CAP-GDF6**

EIC of MS1

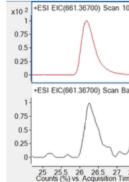

MS1 spectra

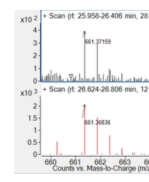

MS2 - 661.4>209.1 (b2+)

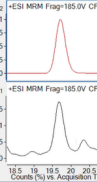

**kk. CAP-GCG**  
EIC of MS1

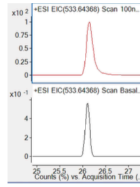

MS1 spectra

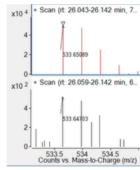

MS2 - 533.6>129.1 (c1+)

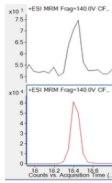

**ll. Gastrin**  
EIC of MS1

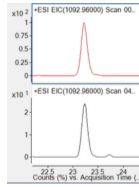

MS1 spectra

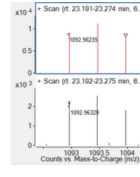

MS2 - 1093.0>1010.9 (b16++)

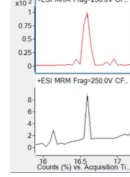

**mm. CAP-COL5A2**  
EIC of MS1

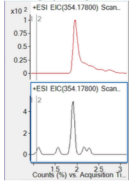

MS1 spectra

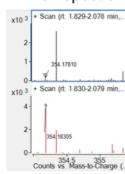

MS2 - 354.2>115.1 (y1+)

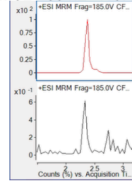

— Mouse Plasma — Synthetic Standard

**Supplementary Figure 1. All raw MS1 chromatograms, MS1 spectra, and MRM transition chromatograms for detected mouse capped peptides. a-mm** The extracted parent ion chromatogram, the MS1 spectra, and MRM fragment ion chromatogram both in mouse plasma (black) and of the synthetic standards (red).

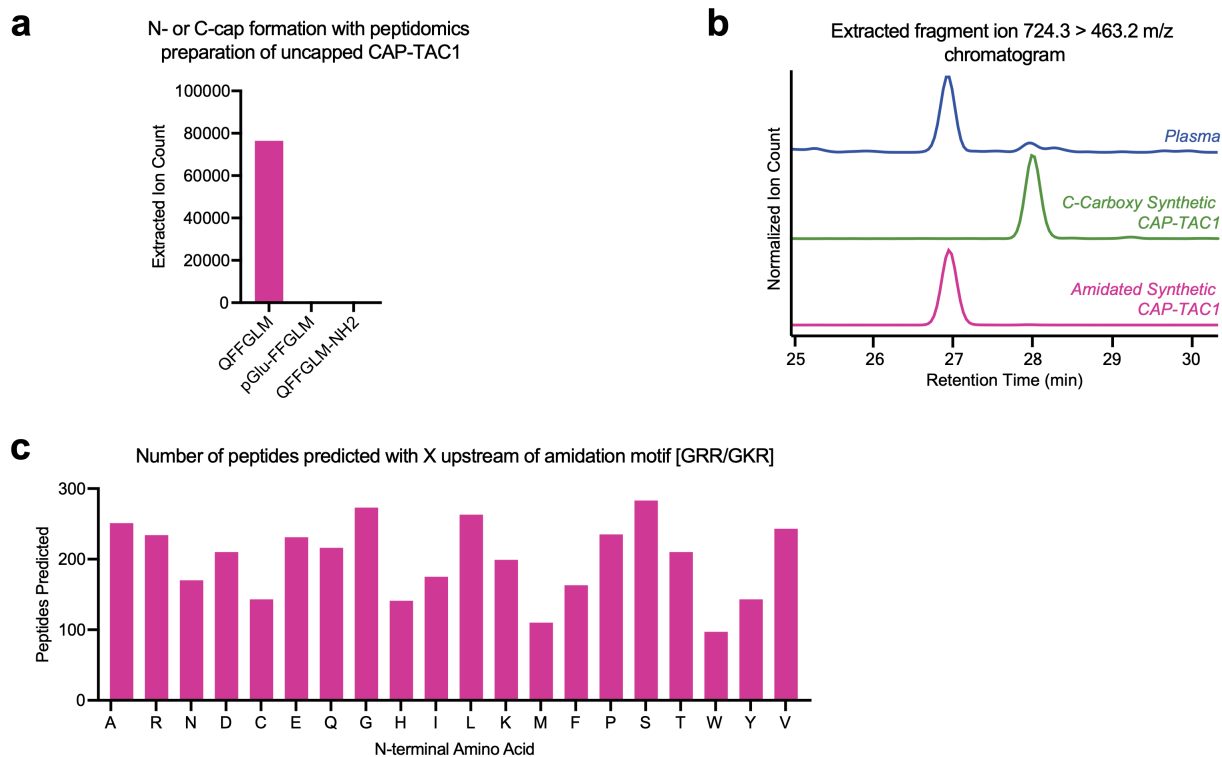

**Supplementary Figure 2. Additional capped peptide prediction analysis and validation of capped peptide extraction and detection.** **a** Extracted ion count of QFFGLM (uncapped CAP-TAC1,  $m/z = 742.359$ ), pGlu-FFGLM ( $m/z = 725.33$ ), or QFFGLM-NH<sub>2</sub> ( $m/z = 741.375$ ) after peptidomics preparation of 10 nM QFFGLM (uncapped) synthetic standard. **b** Chromatograms of CAP-TAC1 b<sub>4+</sub> ion (724.3>463.2) in mouse plasma, 100 nM C-carboxy synthetic CAP-TAC1 standard, and 100 nM C-amidated synthetic CAP-TAC1. **c** Number of peptides predicted when the capped peptide prediction algorithm modified for X N-terminal amino acid upstream of the amidation motif. Source data are provided as a Source Data file.

**a. CAP-TAC1**

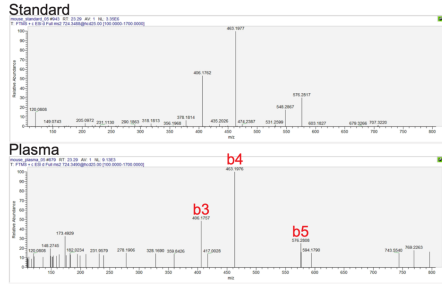

**b. CAP-GDF15**

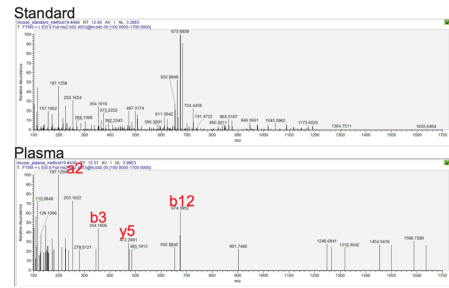

**c. CAP-FGF18**

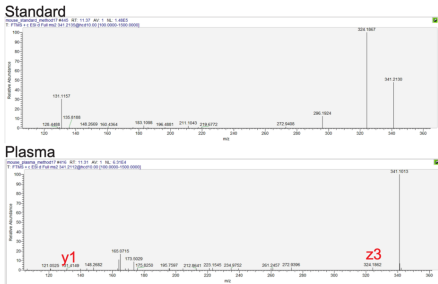

**d. CAP-COL27A1**

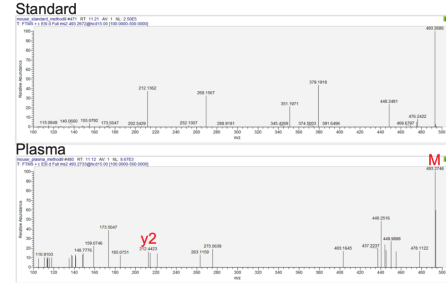

**e. CAP-TENM1**

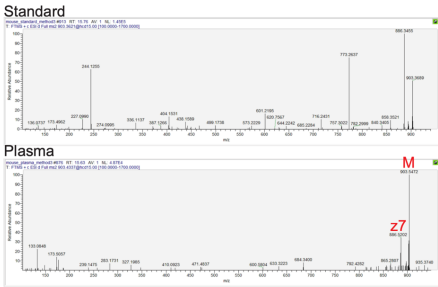

**f. CAP-GDF6**

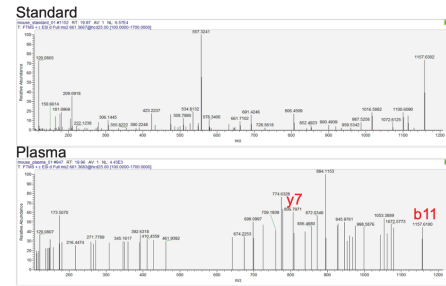

**g. CAP-VIP-2**

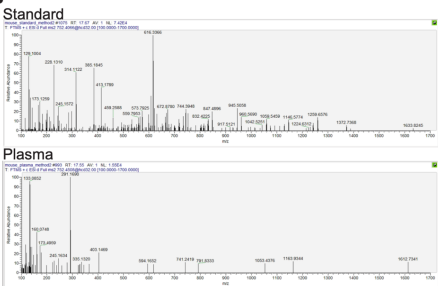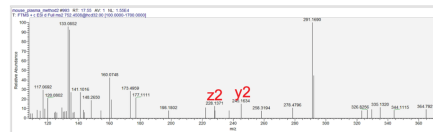

### h. CAP-ALKAL2

Standard

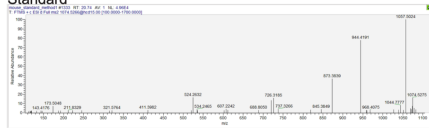

Plasma

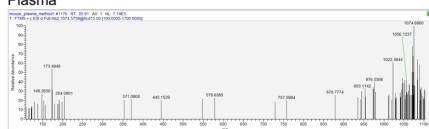

Zoomed >

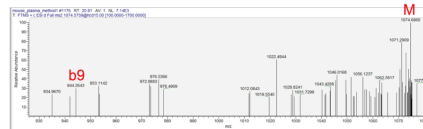

### i. CAP-MST1

Standard

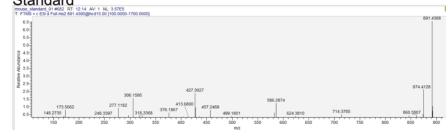

Plasma

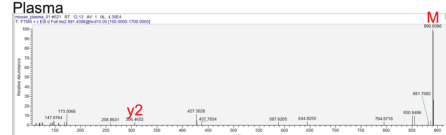

**Supplementary Figure 3. Additional MS2 spectra for mouse capped peptides. a-i** MS2 spectra of 9 mouse capped peptides both in mouse plasma and of the synthetic standards.



CAP-TAC1 and Substance P (6-11) production from  
from substance in plasma

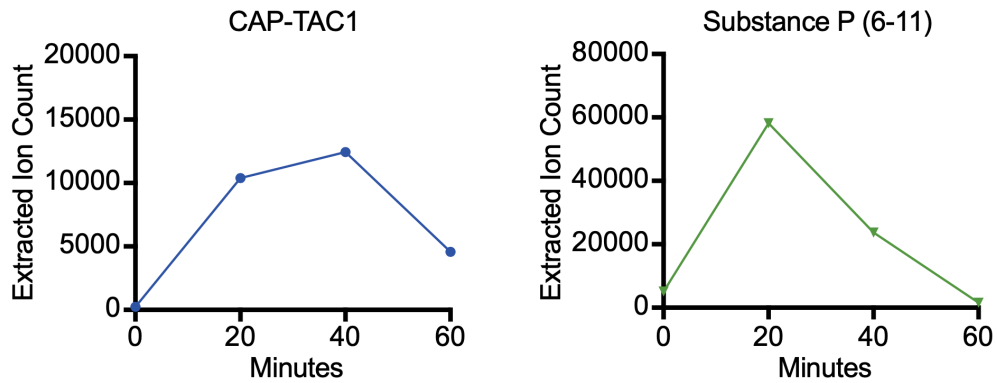

**Supplementary Figure 4. CAP-TAC1 and substance P (6-11) production during substance P degradation.** Relative levels of CAP-TAC1 and substance P (6-11) in mouse plasma following incubation at 37°C for the indicated time. N=2 biological replicates per concentration per time point. Data are shown as means. Source data are provided as a Source Data file.

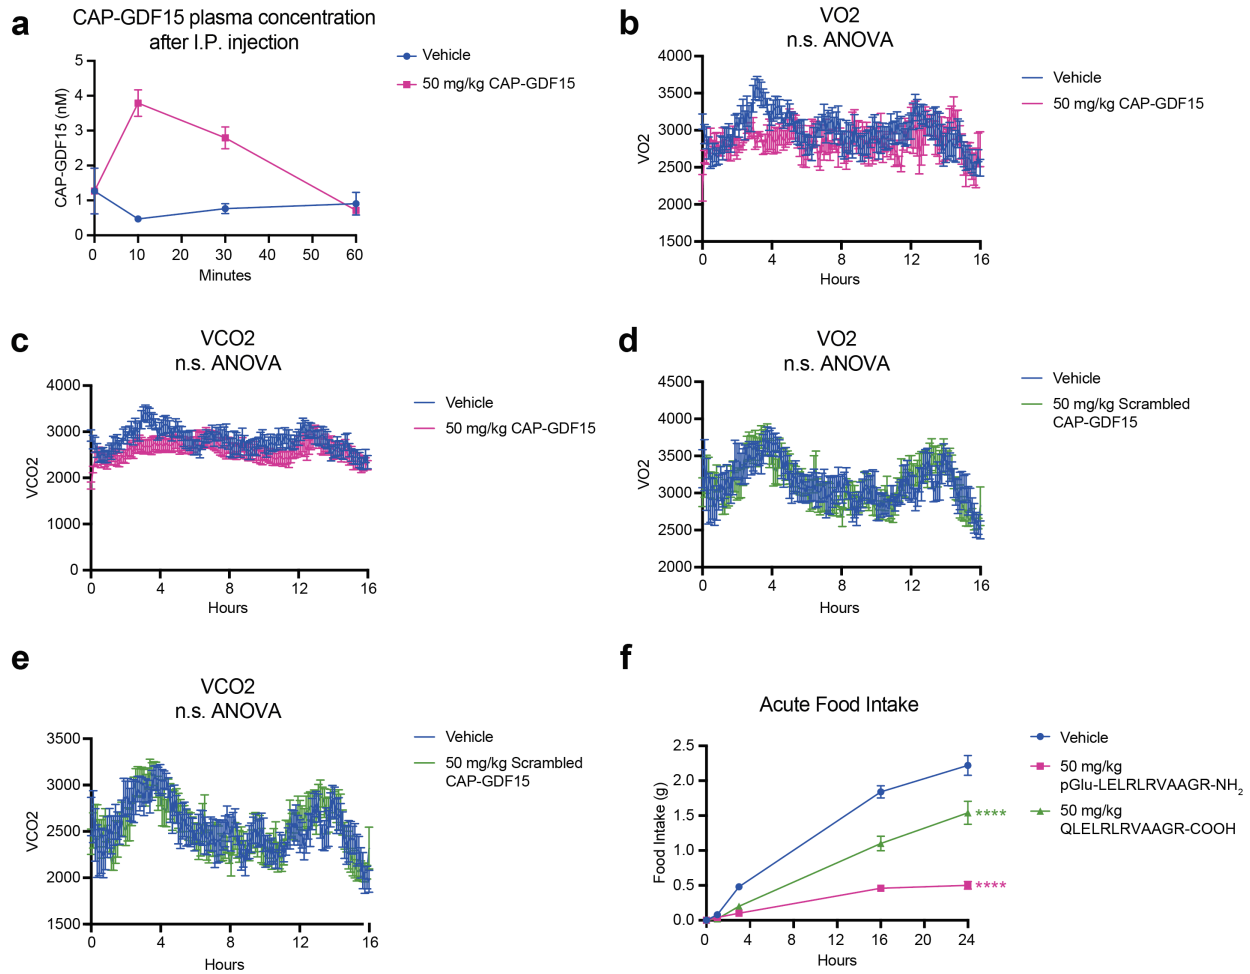

**Supplementary Figure 5. Additional measurements from metabolic chambers of mice treated with CAP-GDF15.** **a** CAP-GDF15 plasma concentration after administration of CAP-GDF15 (50 mg/kg, intraperitoneal) or vehicle control. **b-c** VO<sub>2</sub> (**b**) and VCO<sub>2</sub> (**c**) of 12-16-week diet-induced obese male mice following a single treatment of CAP-GDF15 (50 mg/kg, intraperitoneal) or vehicle control. **d-e** VO<sub>2</sub> (**d**) and VCO<sub>2</sub> (**e**) of 12-16-week diet-induced obese male mice following a single treatment of scrambled CAP-GDF15 (50 mg/kg, intraperitoneal, scrambled sequence: pQGLEALRRLRV-NH<sub>2</sub>) or vehicle control. **f** Acute food intake of 12-16-week diet-induced obese male mice following a single treatment of CAP-GDF15 (50 mg/kg, intraperitoneal), uncapped CAP-GDF15 (50 mg/kg, intraperitoneal), or vehicle control. For (**a**), N=3/group; (**b-c**), N=12/group; for (**d-e**), N=8/group; for (**f**), N=5/group. For (**a-f**), injection occurred at time T=0 (5:00pm). Data are shown as means ± SEM. For (**b-i**), p values were calculated by two-way ANOVA. Source data are provided as a Source Data file.

**a. CAP-TAC1**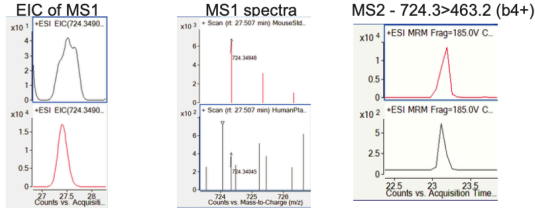**b. CAP-EMILIN1**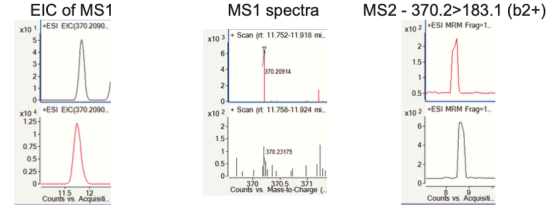**c. CAP-F5**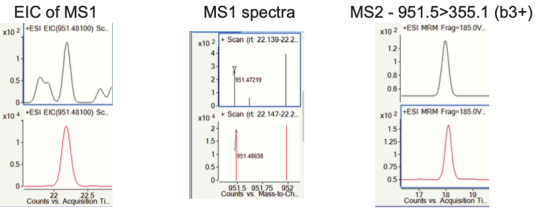**d. CAP-EDN3**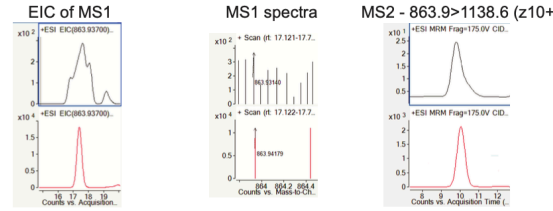**e. CAP-Q59F13**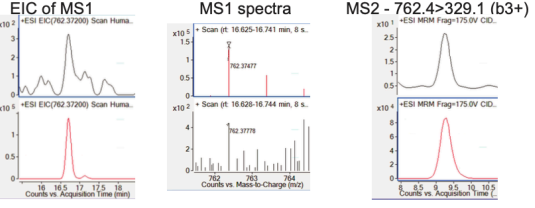**f. CAP-GDNF**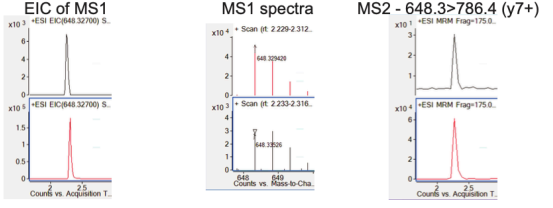**g. CAP-VIP**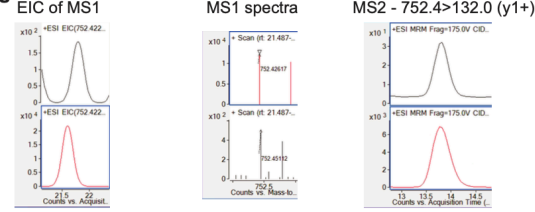**h. CAP-FGF18**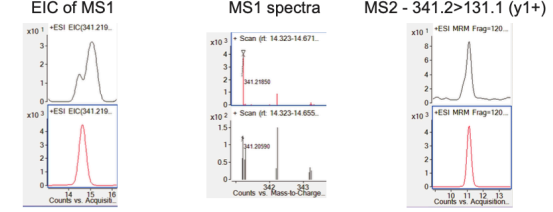**i. CAP-LOXL3**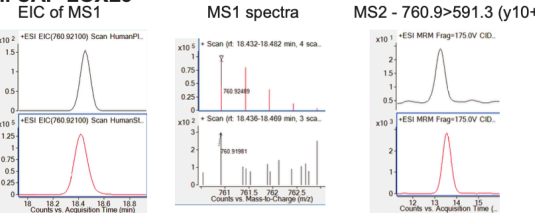**j. CAP-PRG4**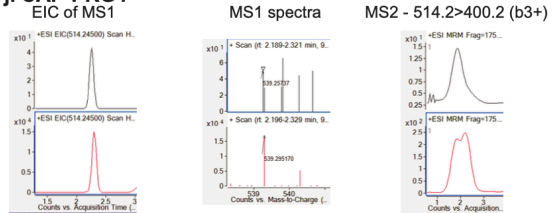**k. CAP-VEGFA**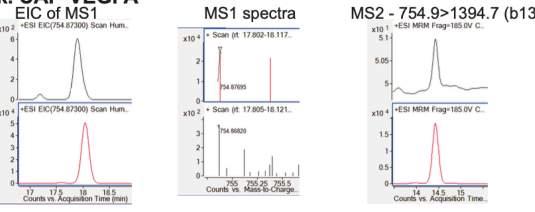**l. CAP-CRLF1**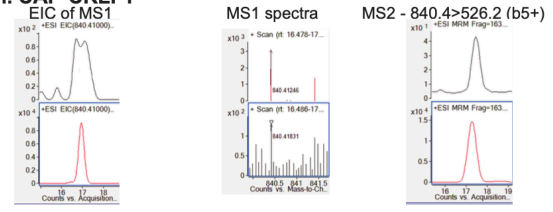

**m. CAP-FURIN**

EIC of MS1

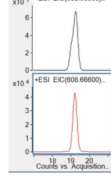

MS1 spectra

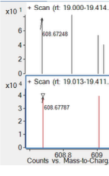

MS2 - 912.5&gt;1363.7 (b11+)

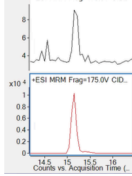**n. CAP-TG**

EIC of MS1

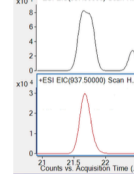

MS1 spectra

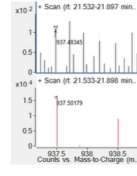

MS2 - 937.5&gt;678.3 (b7+)

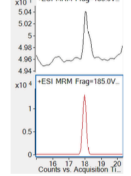**o. CAP-MEGF6-2**

EIC of MS1

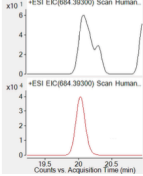

MS1 spectra

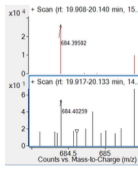

MS2 - 684.4&gt;455.2 (b4+)

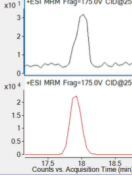**p. CAP-IFNG-1**

EIC of MS1

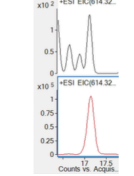

MS1 spectra

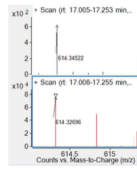

MS2 - 1227.6&gt;486.3 (y5+)

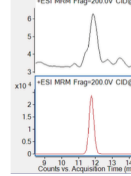**q. CAP-SIGLEC1**

EIC of MS1

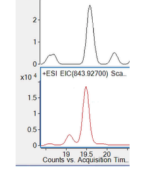

MS1 spectra

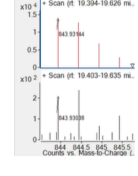

MS2 - 843.9&gt;799.9 (b16++)

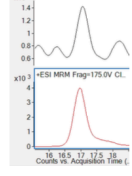**r. CAP-CPAMD8-2**

EIC of MS1

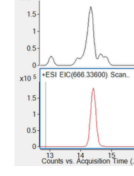

MS1 spectra

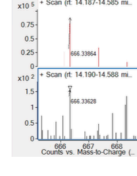

MS2 - 666.3&gt;524.3 (a5+)

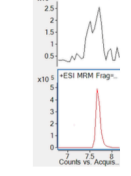**s. CAP-CBLN2**

EIC of MS1

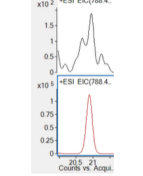

MS1 spectra

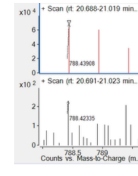

MS2 - 788.4&gt;717.4 (a14++)

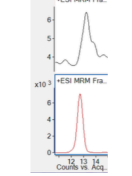**t. CAP-CPAMD8-1**

EIC of MS1

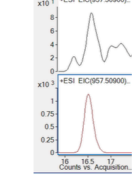

MS1 spectra

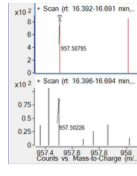

MS2 - 638.7&gt;84.0 (a1+)

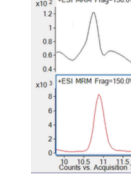**u. CAP-P2MCH**

EIC of MS1

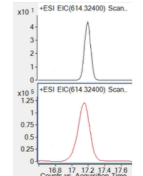

MS1 spectra

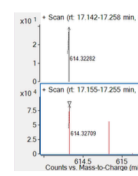

MS2 - 986.5&gt;939.5 (b8+)

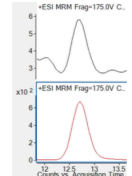**v. CAP-LEFTY2**

EIC of MS1

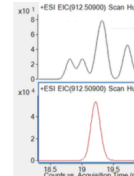

MS1 spectra

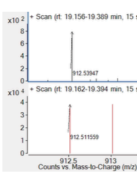

MS2 - 912.5&gt;903.6 (b15+)

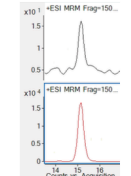**w. CAP-OSM**

EIC of MS1

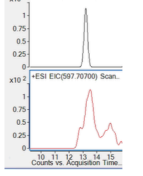

MS1 spectra

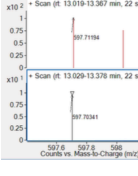

MS2 - 597.7&gt;146.1 (y1+)

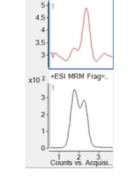**x. CAP-COL27A1**

EIC of MS1

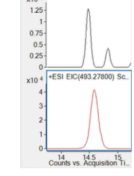

MS1 spectra

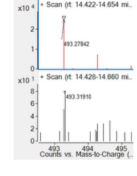

MS2 - 493.3&gt;212.1 (y2+)

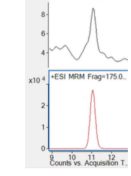

**y. CAP-COL11A2**

EIC of MS1

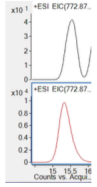

MS1 spectra

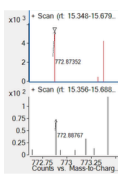

MS2 - 772.9>1192.6 (y13+)

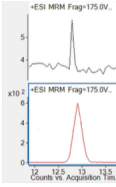

**z. CAP-MUC4**

EIC of MS1

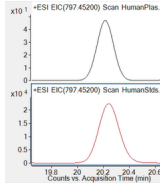

MS1 spectra

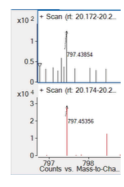

MS2 - 797.4>667.3 (b7+)

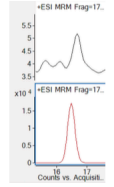

**aa. CAP-F8**

EIC of MS1

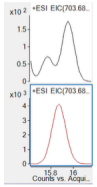

MS1 spectra

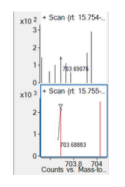

MS2 - 703.7>1110.6 (y10+)

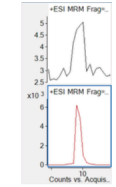

**bb. CAP-BMP4**

EIC of MS1

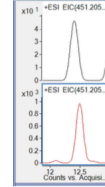

MS1 spectra

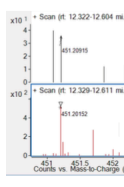

MS2 - 451.2>306.1 (b3+)

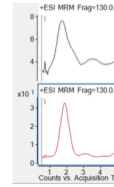

**cc. CAP-COL4A4**

EIC of MS1

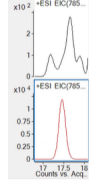

MS1 spectra

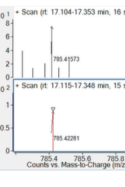

MS2 - 785.4>1160.6 (a12+)

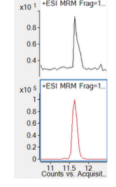

**dd. CAP-LGALS9**

EIC of MS1

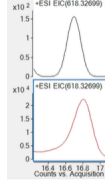

MS1 spectra

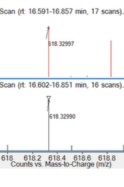

MS2 - 618.3>209.1 (b2+)

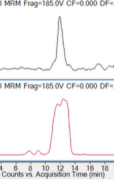

**ee. CAP-LIPC**

EIC of MS1

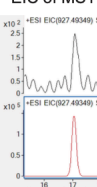

MS1 spectra

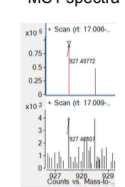

MS2 - 464.2>666.3 (b6+)

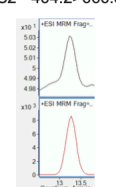

**ff. CAP-WNT9A**

EIC of MS1

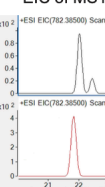

MS1 spectra

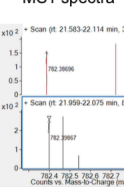

MS2 - 782.4>298.1 (b2+)

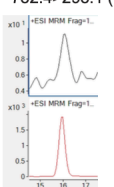

**gg. CAP-VWF**

EIC of MS1

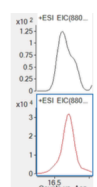

MS1 spectra

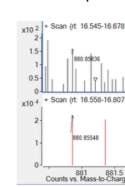

MS2 - 880.9>587.2 (y10++)

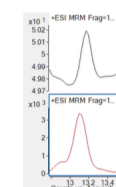

**hh. CAP-THSD1**

EIC of MS1

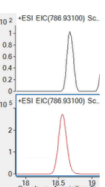

MS1 spectra

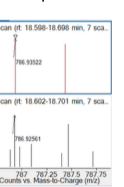

MS2 - 786.9>1006.5 (y8+)

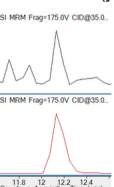

**ii. GnRH**

EIC of MS1

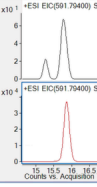

MS1 spectra

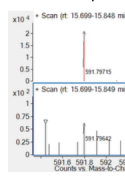

MS2 - 591.8>249.1 (b2+)

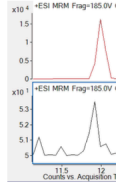

**jj. CAP-GDF15-2**

EIC of MS1

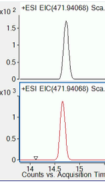

MS1 spectra

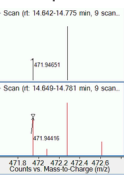

MS2 - 471.9>354.2 (b3+)

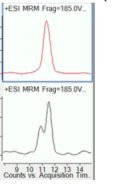

**kk. CAP-COL6A3**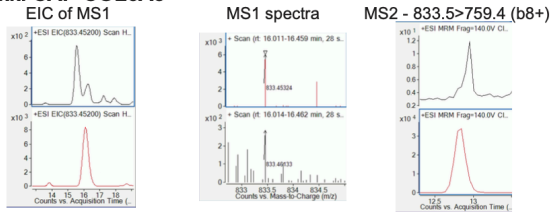**ll. CAP-COL11A1-1**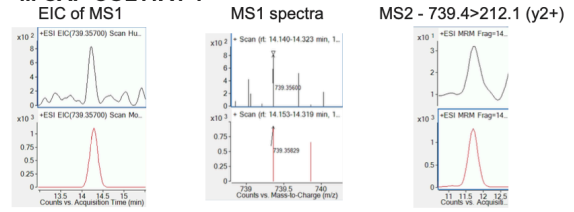**mm. CAP-PAPPA2**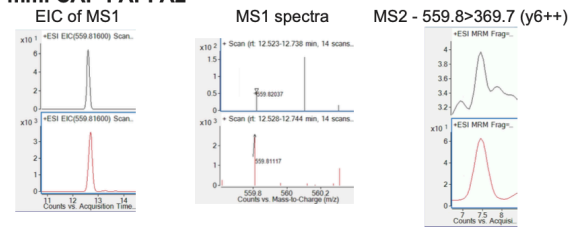**nn. CAP-ADAMTS1**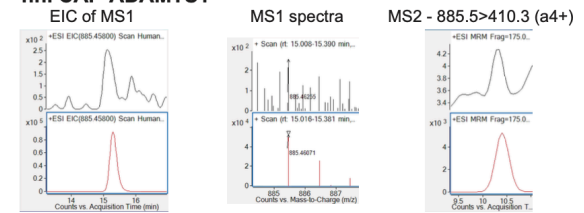**oo. TRH**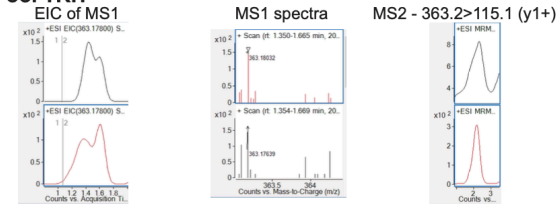**pp. CAP-MMP16**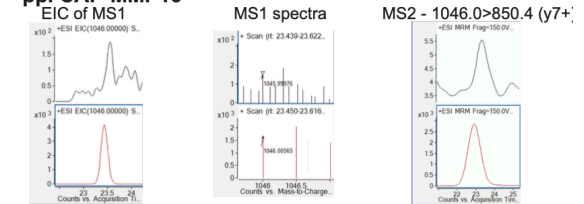**qq. CAP-CILP2**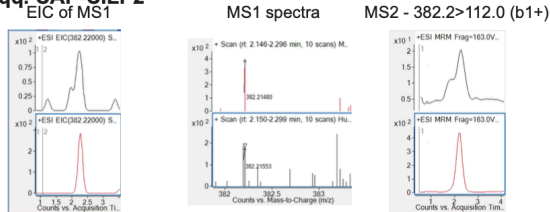**rr. CAP-NXPEA4**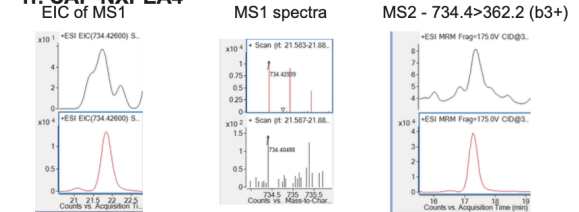**ss. CAP-LGI3**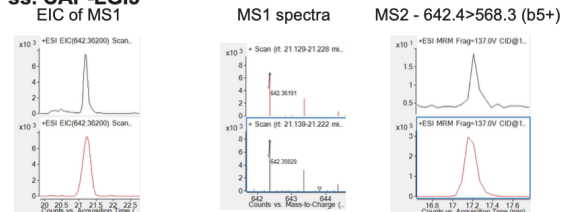

— Human Plasma — Synthetic Standard

**Supplementary Figure 6. All raw MS1 chromatograms, MS1 spectra, and MRM transition chromatograms for detected human capped peptides. a-ss** The extracted parent ion chromatogram, the MS1 spectra, and MRM fragment ion chromatogram both in human plasma (black) and of the synthetic standards (red).

**a. CAP-TAC1**

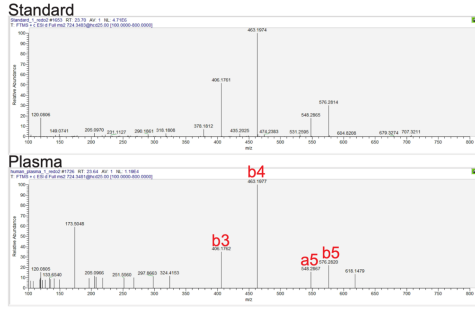

**b. CAP-FGF18**

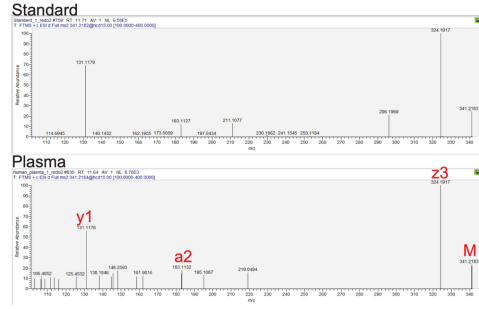

**c. CAP-EMILIN1**

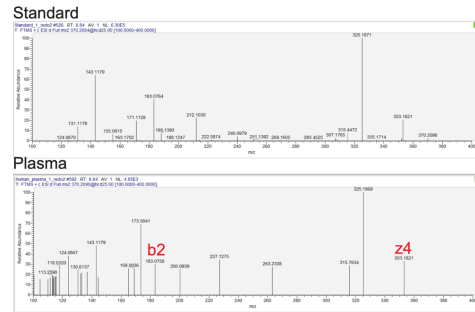

**d. CAP-VIP**

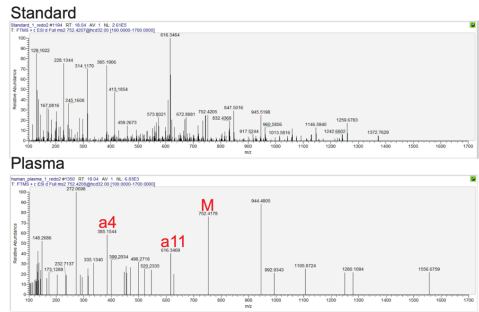

**e. CAP-PMCH**

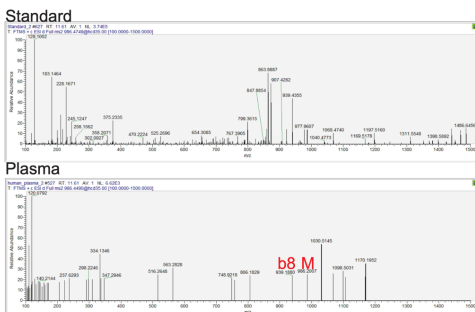

**f. CAP-LGI3**

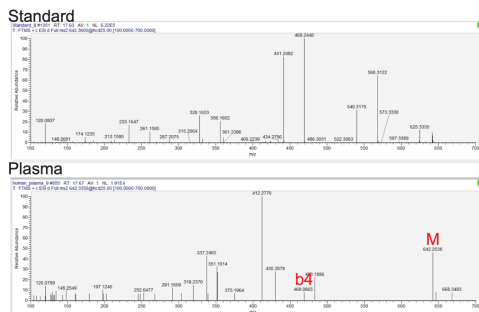

**g. CAP-COL27A1**

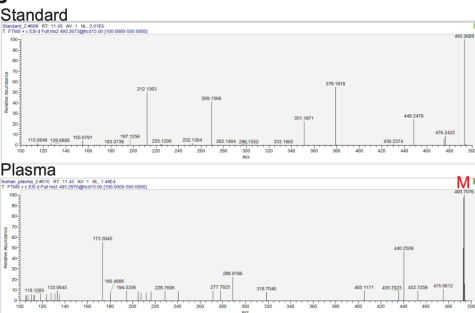

Zoomed >

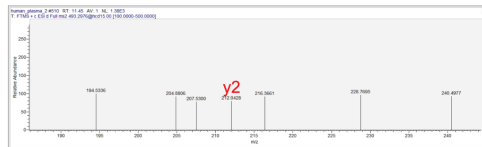

### h. CAP-COL11A2

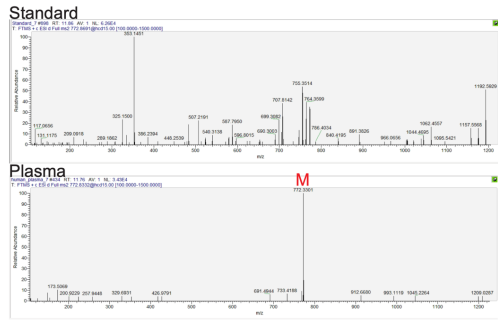

Zoomed >

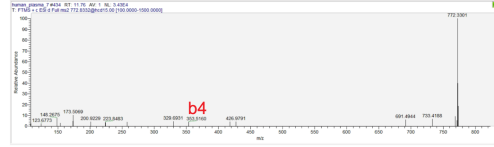

### i. CAP-FURIN

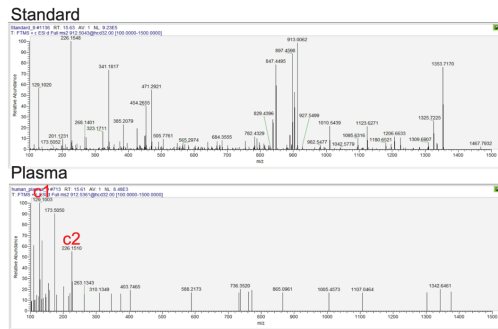

**Supplementary Figure 7. Additional MS2 spectra for human capped peptides. a-i MS2 spectra of 9 human capped peptides both in human plasma and of the synthetic standards.**



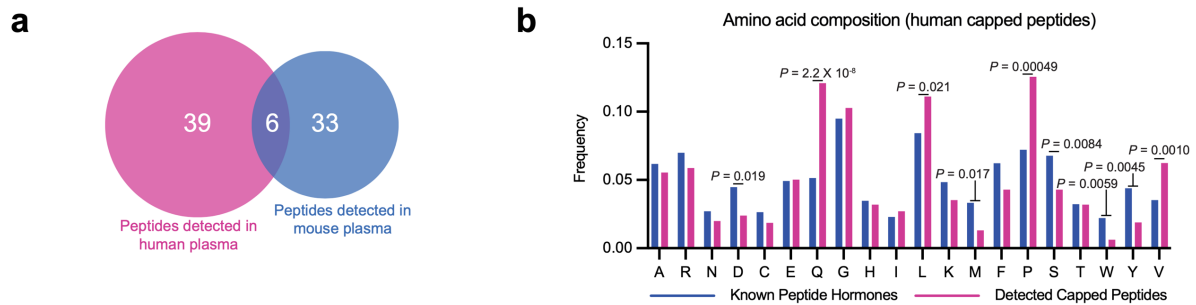

**Supplementary Figure 8. Prediction, detection, and composition analysis of human capped peptides.** **a** Venn diagram showing the amount of peptides detected in human and mouse plasma and overlap between the two. **b** Comparison of frequency of each amino acid between human capped peptides and known peptide hormones. For **(b)**, data is presented as mean of frequency, and P-value versus control was calculated by two-sided Student's t-test. Source data are provided as a Source Data file.

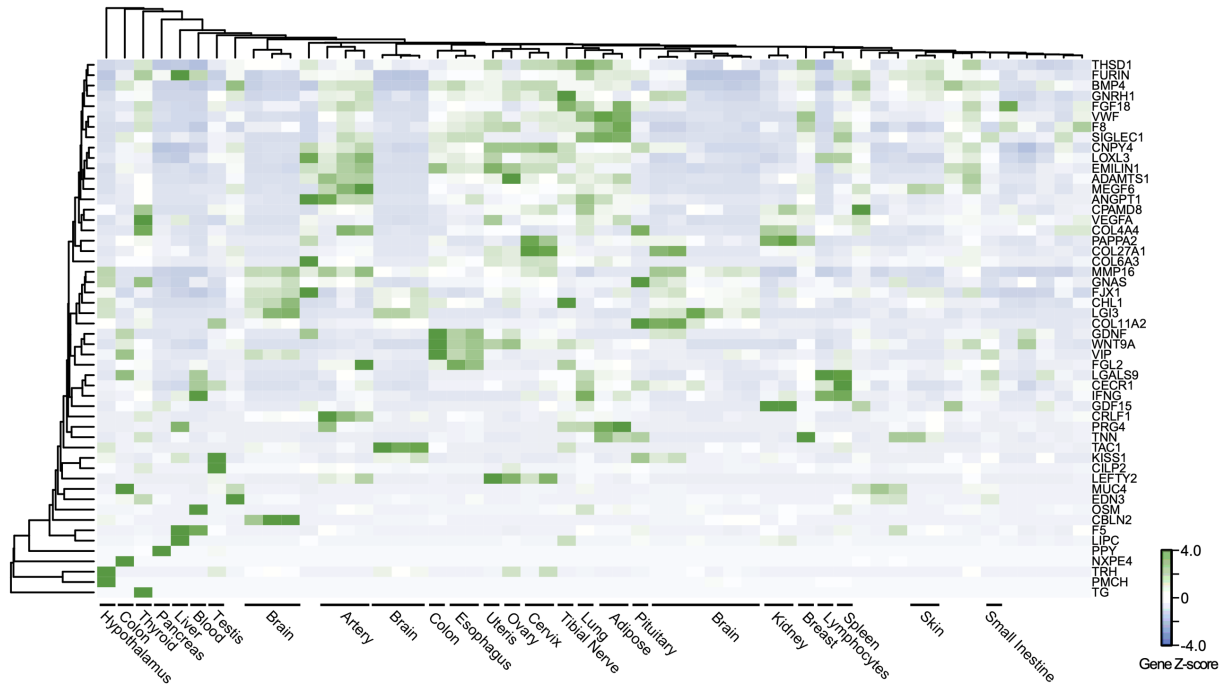

**Supplementary Figure 9. Tissue distribution of mRNAs for home genes corresponding to human capped peptide.** H-clustered heat map of mRNA expression for capped peptide preprop recursor home genes across human tissues and cell types, using GTEx as the reference database. Source data are provided as a Source Data file.
